# Supplementary material for: Removal of Pb (II) from Aqueous Solution by a Pectin-Producing Alga, Penium margaritaceum, Immobilized on Filter Paper
Source: MDPI journal article supplement (doi:10.3390/microbiolres13040073), 2022-12-10
Supplement: s1 [file s1]

## Supplementary Figure

NIES-217

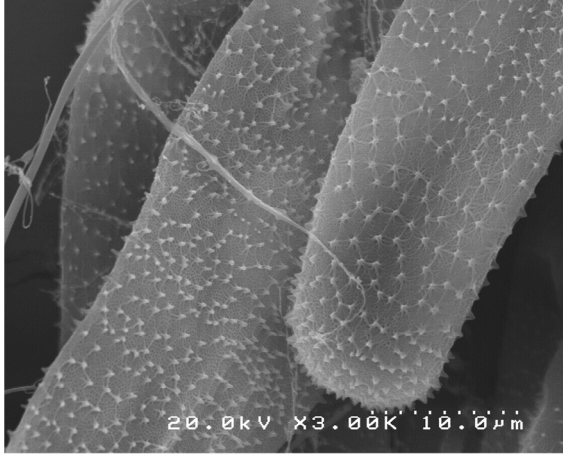

NIES-303

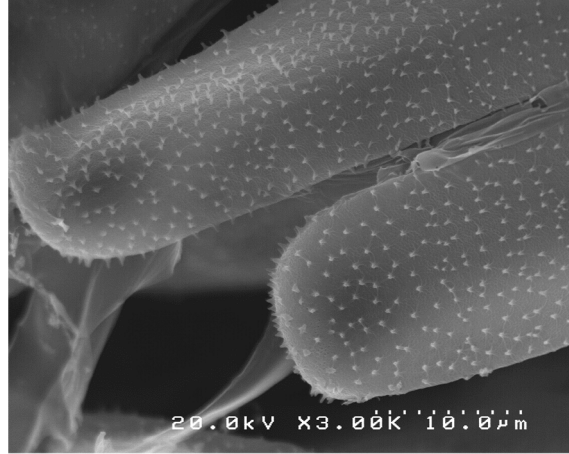

Figure S1. SEM images of lattice structures on NIES-217 and NIES-303 cell surfaces.
